# Supplementary material for: Orthodontic Treatment Does Not Affect Frontal Sinus Development in Female Adults: A Clinical Study
Source: MDPI journal article supplement (doi:10.3390/jcm12030778), 2023-01-18
Supplement: s1 [file s1]

Table S1. Changes in cephalometric measurements during orthodontic treatment and a simple linear regression analysis for the measurement values.

*Angular measurement items*

|                       |               | Orthodontic treatment |             | <i>p</i> -value |                |       |
|-----------------------|---------------|-----------------------|-------------|-----------------|----------------|-------|
|                       |               | Before                | After       | Interaction     | Classification | Time  |
| SNA angle             | Average angle | 81.0 ± 4.4            | 80.8 ± 4.1  | 0.019           | 0.045          | 0.001 |
|                       | High angle    | 79.4 ± 2.8            | 77.5 ± 2.9  |                 |                |       |
|                       | Low angle     | 80.9 ± 3.2            | 80.4 ± 2.9  |                 |                |       |
|                       | Whole         | 80.4 ± 3.6            | 79.5 ± 3.6  |                 |                |       |
| SNB angle             | Average angle | 77.3 ± 2.7            | 77.1 ± 3.0  | 0.350           | 0.000          | 0.014 |
|                       | High angle    | 72.7 ± 3.3            | 71.9 ± 3.0  |                 |                |       |
|                       | Low angle     | 78.5 ± 3.1            | 78.2 ± 3.4  |                 |                |       |
|                       | Whole         | 76.1 ± 3.9            | 75.6 ± 4.2  |                 |                |       |
| ANB angle             | Average angle | 3.7 ± 3.2             | 3.7 ± 2.7   | 0.038           | 0.000          | 0.028 |
|                       | High angle    | 6.7 ± 1.9             | 5.7 ± 1.5   |                 |                |       |
|                       | Low angle     | 2.4 ± 3.0             | 2.3 ± 2.2   |                 |                |       |
|                       | Whole         | 4.3 ± 3.2             | 3.9 ± 2.6   |                 |                |       |
| Facial angle          | Average angle | 86.4 ± 2.5            | 87.2 ± 2.5  | 0.525           | 0.000          | 0.110 |
|                       | High angle    | 81.0 ± 3.1            | 81.1 ± 2.9  |                 |                |       |
|                       | Low angle     | 88.7 ± 2.6            | 89.0 ± 2.3  |                 |                |       |
|                       | Whole         | 85.2 ± 4.2            | 85.6 ± 4.3  |                 |                |       |
| Y-axis                | Average angle | 63.2 ± 2.3            | 62.7 ± 2.1  | 0.680           | 0.000          | 0.307 |
|                       | High angle    | 70.0 ± 3.2            | 69.8 ± 3.2  |                 |                |       |
|                       | Low angle     | 60.5 ± 2.0            | 60.4 ± 2.2  |                 |                |       |
|                       | Whole         | 64.7 ± 4.8            | 64.4 ± 4.8  |                 |                |       |
| Occ.lusal plane angle | Average angle | 89.4 ± 4.9            | 90.3 ± 3.3  | 0.286           | 0.090          | 0.003 |
|                       | High angle    | 86.7 ± 6.6            | 89.5 ± 3.6  |                 |                |       |
|                       | Low angle     | 91.0 ± 7.2            | 92.4 ± 5.5  |                 |                |       |
|                       | Whole         | 89.0 ± 6.4            | 90.7 ± 4.3  |                 |                |       |
| Gonial angle          | Average angle | 123.1 ± 5.8           | 124.5 ± 5.9 | 0.041           | 0.000          | 0.027 |
|                       | High angle    | 131.0 ± 7.0           | 130.4 ± 7.7 |                 |                |       |
|                       | Low angle     | 114.6 ± 5.4           | 116.7 ± 4.7 |                 |                |       |
|                       | Whole         | 123.1 ± 9.0           | 124.1 ± 8.3 |                 |                |       |
| FMA                   | Average angle | 28.6 ± 1.8            | 28.9 ± 1.8  | 0.059           | 0.000          | 0.677 |
|                       | High angle    | 40.3 ± 2.8            | 39.5 ± 2.8  |                 |                |       |
|                       | Low angle     | 20.4 ± 1.9            | 21.2 ± 2.6  |                 |                |       |
|                       | Whole         | 30.1 ± 8.5            | 30.2 ± 7.9  |                 |                |       |
| Palatal plane angle   | Average angle | 7.3 ± 3.6             | 8.79 ± 4.2  | 0.993           | 0.000          | 0.001 |
|                       | High angle    | 11.7 ± 3.2            | 13.35 ± 4.2 |                 |                |       |
|                       | Low angle     | 7.6 ± 3.0             | 9.21 ± 2.7  |                 |                |       |
|                       | Whole         | 8.9 ± 3.8             | 10.49 ± 4.2 |                 |                |       |

|                    |               |              |              |       |       |       |
|--------------------|---------------|--------------|--------------|-------|-------|-------|
| U1 to SN           | Average angle | 107.8 ± 10.3 | 100.7 ± 8.1  | 0.218 | 0.058 | 0.000 |
|                    | High angle    | 104.2 ± 7.0  | 95.4 ± 10.3  |       |       |       |
|                    | Low angle     | 106.1 ± 11.3 | 103.8 ± 7.9  |       |       |       |
|                    | Whole         | 106.0 ± 9.6  | 99.8 ± 9.4   |       |       |       |
| Interincisal angle | Average angle | 120.5 ± 11.4 | 130.1 ± 11.1 | 0.036 | 0.091 | 0.000 |
|                    | High angle    | 112.7 ± 9.6  | 127.9 ± 10.7 |       |       |       |
|                    | Low angle     | 124.1 ± 14.2 | 125.9 ± 9.2  |       |       |       |
|                    | Whole         | 118.9 ± 12.6 | 128.0 ± 10.4 |       |       |       |
| IMPA               | Average angle | 94.6 ± 7.4   | 91.2 ± 9.7   | 0.222 | 0.000 | 0.004 |
|                    | High angle    | 93.8 ± 5.2   | 87.7 ± 7.6   |       |       |       |
|                    | Low angle     | 100.3 ± 6.8  | 99.3 ± 9.5   |       |       |       |
|                    | Whole         | 96.1 ± 7.0   | 92.5 ± 10.0  |       |       |       |
| FMIA               | Average angle | 56.8 ± 6.8   | 59.9 ± 9.8   | 0.087 | 0.000 | 0.006 |
|                    | High angle    | 46.0 ± 5.8   | 52.8 ± 7.4   |       |       |       |
|                    | Low angle     | 59.4 ± 6.6   | 59.6 ± 8.7   |       |       |       |
|                    | Whole         | 53.9 ± 8.6   | 57.4 ± 9.2   |       |       |       |

#### Linear measurement items

|                |               | Orthodontic treatment |             | <i>p</i> -value |                |       |
|----------------|---------------|-----------------------|-------------|-----------------|----------------|-------|
|                |               | Before                | After       | Interaction     | Classification | Time  |
| SN             | Average angle | 69.7 ± 2.9            | 69.7 ± 2.9  | 0.394           | 0.537          | 0.339 |
|                | High angle    | 68.6 ± 2.3            | 68.8 ± 2.5  |                 |                |       |
|                | Low angle     | 69.1 ± 3.6            | 69.1 ± 3.6  |                 |                |       |
|                | Whole         | 69.1 ± 2.9            | 69.2 ± 3.0  |                 |                |       |
| Overjet        | Average angle | 5.5 ± 2.6             | 3.7 ± 0.6   | 0.323           | 0.105          | 0.001 |
|                | High angle    | 5.8 ± 3.5             | 3.6 ± 1.0   |                 |                |       |
|                | Low angle     | 3.9 ± 3.5             | 3.2 ± 0.9   |                 |                |       |
|                | Whole         | 5.1 ± 3.3             | 3.5 ± 0.8   |                 |                |       |
| Overbite       | Average angle | 2.8 ± 1.7             | 2.3 ± 1.0   | 0.002           | 0.012          | 0.873 |
|                | High angle    | 0.6 ± 2.3             | 2.0 ± 0.8   |                 |                |       |
|                | Low angle     | 2.5 ± 2.5             | 1.7 ± 0.9   |                 |                |       |
|                | Whole         | 2.0 ± 2.3             | 2.0 ± 0.9   |                 |                |       |
| Wits appraisal | Average angle | 0.3 ± 3.6             | -0.3 ± 2.5  | 0.260           | 0.075          | 0.008 |
|                | High angle    | 2.6 ± 5.4             | 0.4 ± 2.9   |                 |                |       |
|                | Low angle     | -0.9 ± 5.3            | -1.7 ± 3.9  |                 |                |       |
|                | Whole         | 0.7 ± 4.9             | -0.5 ± 3.2  |                 |                |       |
| N-Me           | Average angle | 127.0 ± 3.2           | 126.9 ± 3.2 | 0.059           | 0.000          | 0.803 |
|                | High angle    | 134.0 ± 4.4           | 133.7 ± 4.2 |                 |                |       |
|                | Low angle     | 125.3 ± 3.3           | 125.5 ± 3.1 |                 |                |       |
|                | Whole         | 128.9 ± 5.3           | 128.8 ± 5.0 |                 |                |       |
| Ar-Go          | Average angle | 50.2 ± 4.2            | 50.2 ± 4.2  | 0.394           | 0.000          | 0.339 |
|                | High angle    | 45.5 ± 4.2            | 45.7 ± 4.3  |                 |                |       |

|       |               |             |             |       |       |       |
|-------|---------------|-------------|-------------|-------|-------|-------|
| Ar-Me | Low angle     | 54.0 ± 3.8  | 54.0 ± 3.8  | 0.839 | 0.000 | 0.121 |
|       | Whole         | 49.7 ± 5.3  | 49.8 ± 5.3  |       |       |       |
|       | Average angle | 108.6 ± 4.4 | 108.6 ± 4.4 |       |       |       |
|       | High angle    | 103.4 ± 5.0 | 103.4 ± 5.1 |       |       |       |
|       | Low angle     | 109.4 ± 3.7 | 109.4 ± 3.7 |       |       |       |
|       | Whole         | 107.0 ± 5.1 | 107.1 ± 5.1 |       |       |       |
|       | Average angle | 71.5 ± 4.5  | 71.5 ± 4.5  |       |       |       |
|       | High angle    | 67.8 ± 4.0  | 67.5 ± 3.8  |       |       |       |
| Go-Me | Low angle     | 72.0 ± 3.6  | 72.0 ± 3.6  | 0.338 | 0.002 | 0.433 |
|       | Whole         | 70.3 ± 4.4  | 70.3 ± 4.4  |       |       |       |

Red text indicates variables with statistically significant differences between the pre-treatment and post-treatment values and among three subgroups. Low angle, low mandibular plane angle group; Average angle, average mandibular plane angle group; High angle, high mandibular plane angle group
